# Supplementary material for: Heart Images on Food Labels: A Health Claim or Not?
Source: PubMed Central journal article supplement (PMC8002900; doi:10.3390/foods10030643), 2021-03-18
Supplement: foods-10-00643-s001.pdf [file foods-10-00643-s001.pdf]

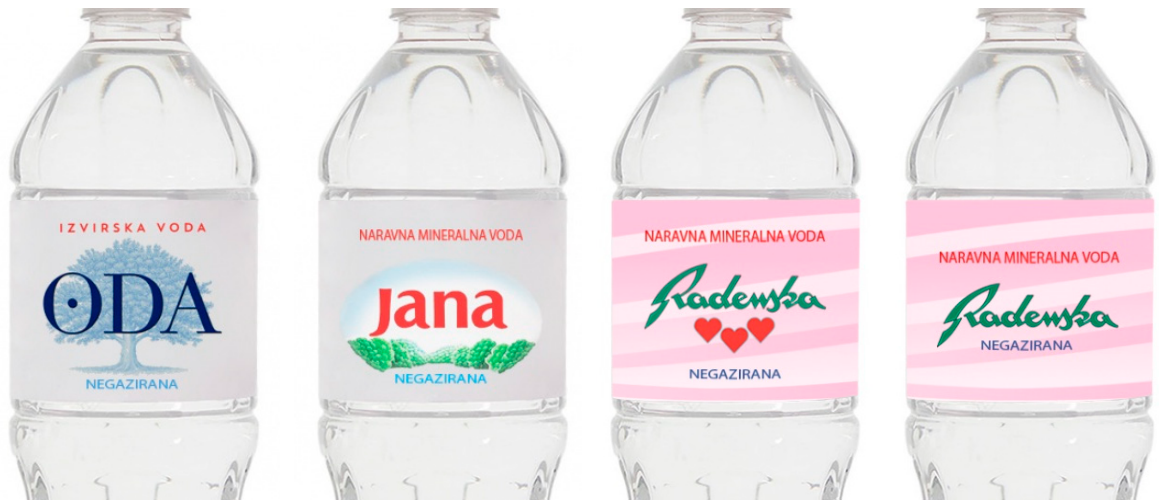

(1) Oda

(2) Jana

(3a) Radenska  
with image  
of three hearts

(3b) Radenska  
without image  
of three hearts

**Figure S1.** Stimuli used for choice-based task with real-life elements.

**Table S1.** Numbers of foods labelled with heart symbol within different food categories and subcategories.

| Food category                        | Number of food products | Number of foods with heart on FOP | Number of foods with heart as part of the brand |
|--------------------------------------|-------------------------|-----------------------------------|-------------------------------------------------|
| <b>Beverages</b>                     | <b>1396</b>             | <b>98 (7%)</b>                    | <b>52 (4%)</b>                                  |
| Fruit and vegetable juices           | 301                     | 3 (3%)                            | 0                                               |
| Soft drinks                          | 348                     | 28 (29%)                          | 4 (8%)                                          |
| Cordials                             | 92                      | 8 (8%)                            | 7 (13%)                                         |
| Coffee and tea                       | 560                     | 32 (33%)                          | 23 (44%)                                        |
| Electrolyte drinks                   | 13                      | 0                                 | 0                                               |
| Waters                               | 82                      | 27 (28%)                          | 18 (35%)                                        |
| <b>Bread and bakery products</b>     | <b>1246</b>             | <b>152 (12%)</b>                  | <b>31 (2%)</b>                                  |
| Bread                                | 154                     | 32 (21%)                          | 0                                               |
| Biscuits                             | 732                     | 64 (42%)                          | 15 (48%)                                        |
| Cakes, muffins and pastries          | 360                     | 56 (37%)                          | 16 (52%)                                        |
| <b>Cereal and cereal products</b>    | <b>1040</b>             | <b>107 (10%)</b>                  | <b>45 (4%)</b>                                  |
| Cereal bars                          | 61                      | 2 (2%)                            | 2 (4%)                                          |
| Noodles                              | 115                     | 14 (13%)                          | 3 (7%)                                          |
| Breakfast cereals                    | 297                     | 52 (49%)                          | 30 (67%)                                        |
| Pasta                                | 325                     | 27 (25%)                          | 9 (20%)                                         |
| Maize (corn)                         | 16                      | 0                                 | 0                                               |
| Rice                                 | 103                     | 5 (5%)                            | 0                                               |
| Couscous                             | 12                      | 0                                 | 0                                               |
| Unprocessed cereals                  | 111                     | 7 (7%)                            | 1 (2%)                                          |
| <b>Confectionary</b>                 | <b>1141</b>             | <b>64 (6%)</b>                    | <b>5 (0.4%)</b>                                 |
| Chocolate and sweets                 | 1075                    | 63 (98%)                          | 5 (100%)                                        |
| Jelly                                | 6                       | 1 (2%)                            | 0                                               |
| Chewing gum                          | 60                      | 0                                 | 0                                               |
| <b>Convenience food</b>              | <b>549</b>              | <b>58 (11%)</b>                   | <b>41 (7%)</b>                                  |
| Pizza                                | 34                      | 1 (2%)                            | 0                                               |
| Soup                                 | 172                     | 36 (62%)                          | 35 (85%)                                        |
| Ready meals                          | 297                     | 21 (36%)                          | 6 (15%)                                         |
| Prepared salads and sandwiches       | 46                      | 0                                 | 0                                               |
| Other                                | 0                       | 0                                 | 0                                               |
| <b>Dairy</b>                         | <b>1601</b>             | <b>123 (8%)</b>                   | <b>41 (2%)</b>                                  |
| Cheese                               | 457                     | 18 (15%)                          | 0                                               |
| Yoghurt products                     | 449                     | 30 (24%)                          | 0                                               |
| Milk                                 | 178                     | 14 (11%)                          | 0                                               |
| Cream                                | 106                     | 7 (6%)                            | 0                                               |
| Desserts                             | 185                     | 24 (20%)                          | 18 (44%)                                        |
| Ice cream and edible ices            | 226                     | 30 (24%)                          | 23 (56%)                                        |
| <b>Edible oils and oil emulsions</b> | <b>304</b>              | <b>46 (15%)</b>                   | <b>30 (10%)</b>                                 |
| Butter and margarine                 | 94                      | 7 (15%)                           | 4 (13%)                                         |
| Cooking oils                         | 210                     | 39 (85%)                          | 26 (87%)                                        |
| <b>Eggs</b>                          | <b>38</b>               | <b>11 (29%)</b>                   | <b>0</b>                                        |
| Eggs                                 | 38                      | 11 (100%)                         | 0                                               |
| <b>Fish and fish products</b>        | <b>287</b>              | <b>5 (2%)</b>                     | <b>0</b>                                        |
| Canned fish and seafood              | 165                     | 4 (80%)                           | 0                                               |
| Chilled fish                         | 44                      | 0                                 | 0                                               |
| Frozen fish                          | 78                      | 1 (20%)                           | 0                                               |
| <b>Food for specific dietary use</b> | <b>104</b>              | <b>53 (51%)</b>                   | <b>53 (51%)</b>                                 |
| Baby food                            | 104                     | 53 (100%)                         | 53 (100%)                                       |
| <b>Fruit and vegetables</b>          | <b>1133</b>             | <b>38 (3%)</b>                    | <b>18 (2%)</b>                                  |

| Food category                             | Number of food products | Number of foods with heart on FOP | Number of foods with heart as part of the brand |
|-------------------------------------------|-------------------------|-----------------------------------|-------------------------------------------------|
| Vegetables                                | 527                     | 20 (53%)                          | 5 (28%)                                         |
| Fruit                                     | 250                     | 7 (18%)                           | 2 (11%)                                         |
| Jams and spreads                          | 182                     | 11 (29%)                          | 11 (61%)                                        |
| Nuts and seeds                            | 174                     | 0                                 | 0                                               |
| <b>Meat and meat products</b>             | <b>828</b>              | <b>135 (16%)</b>                  | <b>0</b>                                        |
| Processed meat and derivatives            | 767                     | 133 (99%)                         | 0                                               |
| Meat alternatives                         | 61                      | 2 (1%)                            | 0                                               |
| <b>Sauces and spreads</b>                 | <b>653</b>              | <b>45 (7%)</b>                    | <b>19 (3%)</b>                                  |
| Sauces                                    | 318                     | 16 (36%)                          | 8 (42%)                                         |
| Mayonnaise/dressings                      | 55                      | 9 (20%)                           | 2 (11%)                                         |
| Spreads                                   | 280                     | 20 (44%)                          | 9 (47%)                                         |
| <b>Snack foods</b>                        | <b>241</b>              | <b>28 (12%)</b>                   | <b>23 (10%)</b>                                 |
| Crisps and snacks                         | 241                     | 28 (100%)                         | 23 (100%)                                       |
| <b>Sugars, honey and related products</b> | <b>12</b>               | <b>4 (33%)</b>                    | <b>0</b>                                        |
| Honey and syrups                          | 12                      | 4 (100%)                          | 0                                               |
| <b>TOTAL</b>                              | <b>10,573</b>           | <b>967 (9%)</b>                   | <b>348 (3%)</b>                                 |
